# Gecko toe and lamella adhesion on macroscopically rough surfaces

A.G. GILLIES, A. HENRY, H. LIN, A. REN,  
K. SHIUA, R. KING, R. FULL

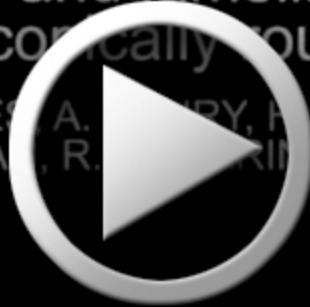

**PLAY VIDEO**

University of California, Berkeley

**Movie 1.** Lamellar–surface interactions. Video of lamellae interacting with surfaces of varying wavelength and amplitude.
